# Supplementary material for: Systematic large-scale meta-analysis identifies a panel of two mRNAs as blood biomarkers for colorectal cancer detection
Source: PubMed Central journal article supplement (PMC5058681; doi:10.18632/oncotarget.8108), 2016-03-16
Supplement: oncotarget-07-30295-s001.pdf [file oncotarget-07-30295-s001.pdf]

# Systematic large-scale meta-analysis identifies a panel of two mRNAs as blood biomarkers for colorectal cancer detection

## Supplementary Materials

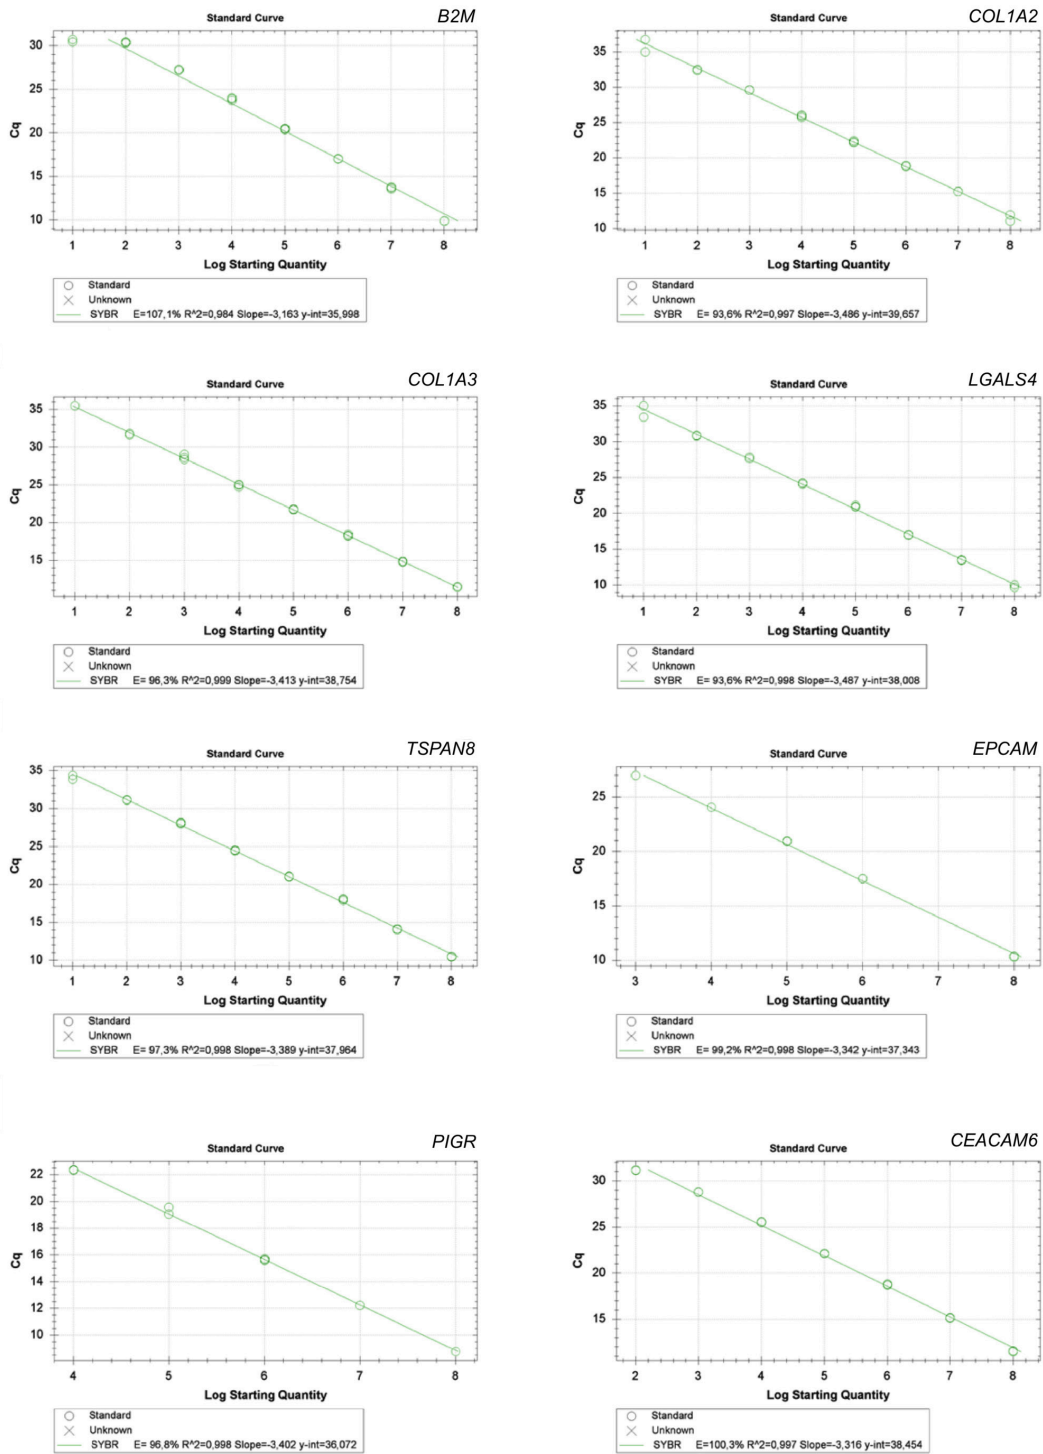

Supplementary Figure S1: Standard curves of primers.

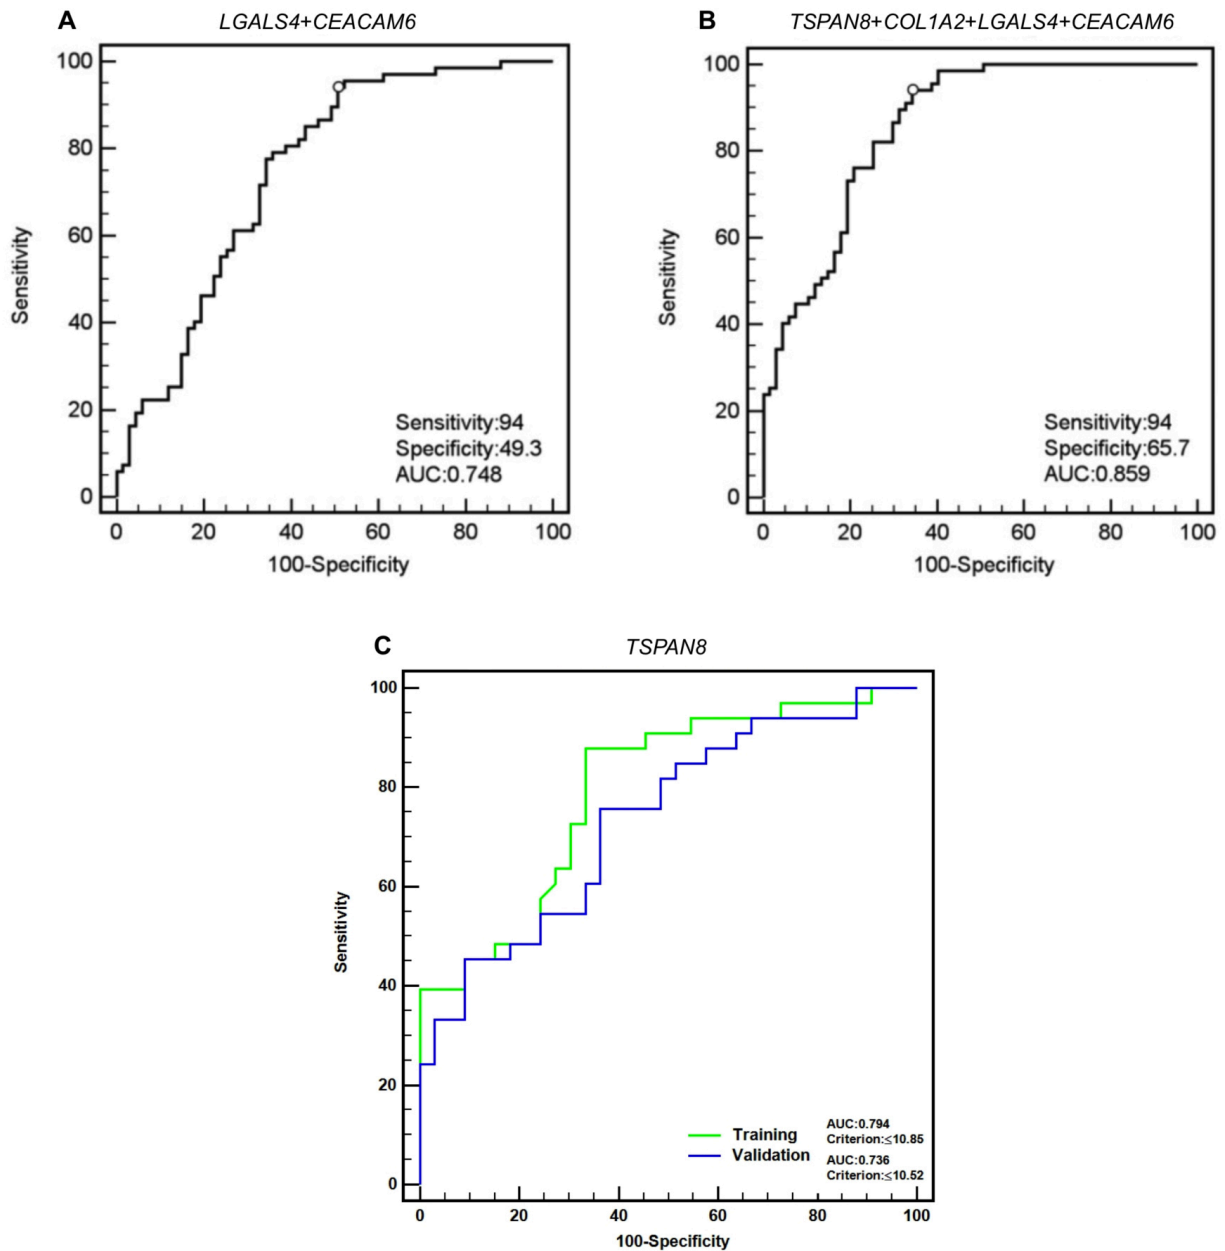

**Supplementary Figure S2: ROC curves of panels of the indicated marker combinations. (A) *LGALS4 + CEACAM6*; (B) *TSPAN8 + COL1A2 + LGALS4 + CEACAM6*; (C) Training/validation test for *TSPAN8*.**

**Supplementary Table S1: Pool 'A' - CRC Samples  
Pool 'B' - Blood Samples**

**Supplementary Table S2: List of 31,804 mapped loci of Transcriptome Map Comparison of CRC vs. Blood Cells (Pool 'A' vs Pool 'B' ) sorted in descending order of 'A'/'B' expression value. SD = Standard Deviation expressed as percentage of the Expression Value.**

**Supplementary Table S3: Primers efficiency (%)**

|                | <b>EFFICIENCY (%)</b> | <b>SLOPE</b> |
|----------------|-----------------------|--------------|
| <i>B2M</i>     | 107.1                 | -3.163       |
| <i>COL1A2</i>  | 93.6                  | -3.486       |
| <i>COL1A3</i>  | 96.3                  | -3.413       |
| <i>LGALS4</i>  | 93.6                  | -3.487       |
| <i>TSPAN8</i>  | 97.3                  | -3.389       |
| <i>CEACAM6</i> | 100.3                 | -3.316       |
| <i>EPCAM</i>   | 99.2                  | -3.342       |
| <i>PIGR</i>    | 96.8                  | -3.4         |

**Supplementary Table S4: Positive predicted values (PPV) and negative predicted values (NPV) for the indicated markers and the best panel combination.**

|                      | <b>PPV</b> | <b>NPV</b> |
|----------------------|------------|------------|
| <i>TSPAN8</i>        | 67.47%     | 78.43%     |
| <i>LGALS4</i>        | 67.90%     | 77.36%     |
| <i>COL1A2</i>        | 64.00%     | 68.97%     |
| <i>CEACAM6</i>       | 61.64%     | 63.93%     |
| <i>TSPAN8+LGALS4</i> | 76.25%     | 88.85%     |
